# Supplementary material
Source: Springer Nature journal article supplement (https://www.springermedizin.de/resource/supplementary/12888_2004_100_MOESM4_ESM.pdf/9481842)

6-beta-Naltrexol (mg/mL)

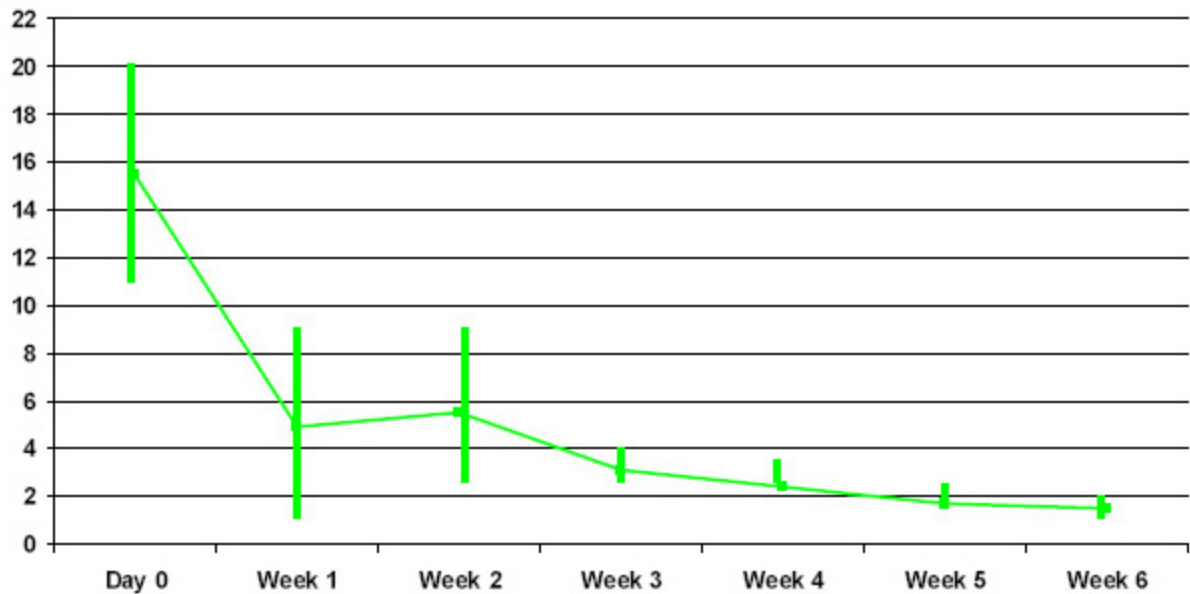

Supplement: MOESM4 [file 9481842]
